# Supplementary material
Source: PubMed Central journal article supplement (PMC8266663)
Supplement: ofab243_suppl_supplementary_materials.pdf [file ofab243_suppl_supplementary_materials.pdf]

1 **Supplementary Materials**

2

3 **Supplementary Methods**

4

5 Anterior Nasal Swab Collection procedure

6 Manufacturer-provided swabs [SteriPack Sterile Polyester Spun Swab, 3” (Lakeland, Florida)]  
7 were utilized for the entire study. The following swab collection procedure was utilized: after  
8 the participant blew their nose, the collector inserted swab #1 into the individual’s right nostril  
9 and rotated the swab 5 times in a circular motion around the inside wall of the nostril for a  
10 duration of 10-15 seconds, followed by a repeat of the process in the left nostril. The swab was  
11 placed into a sterile plastic tube. Immediately thereafter, swab #2 was inserted into the  
12 individual’s left nostril (always opposite from the initial swab) and the process repeated (left  
13 nostril followed by right nostril). To minimize sampling bias, the study site personnel alternated  
14 which test-specific nasal swab sample was collected first (CareStart or RT-PCR).

15

16 Testing Site

17 Testing was performed in a temperature-controlled mobile trailer (70.5-74.3°F) to maintain the  
18 minimal temperature (15°C) for testing per manufacturer’s instructions for use (IFU). Test kits  
19 were also stored in the trailer. The testing site contained three 6’ tables. Two tables were  
20 designated as “dirty” for testing purposes and one “clean” for data entry. Absorbent underpads  
21 with plastic backing (Attends ASB-2336, Greenville, NC) were placed on testing tables along  
22 with hand sanitizer, gloves, testing kits, pens, sticky notes, a continuous temperature and  
23 humidity data logger, a digital clock, and a bin for specimens to be tested. The clean table  
24 included hand sanitizer, gloves, pens, a time stamp machine, and a laptop computer for data  
25 entry. Underpads were removed daily, surfaces were disinfected with germicidal disposable

26 wipes (PDI, Woodcliff Lake, NJ), and new underpads placed. Operators performing testing were  
27 wearing disposable gowns, N95 respirators, face shields and gloves.

28

### 29 Quality Control

30 Lot numbers were recorded for CareStart kits (boxes of 20 tests and extraction vials, and positive  
31 controls). Each study subject tested was recorded for every kit of CareStart tests used. Positive  
32 and negative controls were run on a new box at the start of each day. If an opened kit was not  
33 used in full over the course of one day, a negative control was run for the kit the following day  
34 when testing resumed.

35

### 36 CareStart Testing

37 At the collection site, anterior nasal swab specimens were collected using the manufacturer-  
38 provided swab (above) into a labeled sterile 15ml or 25ml conical tube and placed into a  
39 specimen collection bag with a CareStart intake form (which was labeled and time/date stamped  
40 at the time of collection) and extra patient labels. Specimens were then shuttled to the testing  
41 trailer by a designated individual (“runner”) by car in a closed specimen transport container.  
42 Tests were initiated as soon as possible and within an hour of specimen collection time. For each  
43 specimen, testing staff extracted the swab in the extraction buffer as per the IFU and affixed a  
44 patient label to both the outside of the extraction vial and the CareStart cartridge. The time the  
45 extracted material was applied to the test cartridge was recorded on the CareStart intake form as  
46 the test start time. The test start time and time the test was to be read (10 minutes after adding the  
47 sample) were also recorded on a sticky note and adhered to the outside of the CareStart cartridge.  
48 At the time of result reading, the tester silently recorded their result, initials, and time (between  
49 10 and 15 minutes after adding the sample) on the CareStart intake form as the official result.

50 The tester then passed the cartridge to a second reader, who read the test result aloud (so that the  
51 tester could record results on the back of the intake form) and took a photo of any positive result.  
52 There was no attempt to resolve any discordance between the two readers; the first read of each  
53 test was the official result used for database and clinical reporting. If the result was determined  
54 to be positive by either reader, the reader categorized the positive line as “faint”, “medium”, or  
55 “strong” depending on the strength of the positive sample line compared to the control line of  
56 each card. Completed CareStart cartridges were discarded in biohazard waste.

57

#### 58 RT-PCR assay details

59 Dry swabs (SteriPack Sterile Polyester Spun Swab, 3” (Lakeland, Florida)) transported in a  
60 sterile tube (Becton Dickinson, # BD 366408) at room temperature were resuspended in 1000 µL  
61 of Swab Preservation Buffer (Norgen Biotek, Inc) and allowed to elute for 15 minutes.

62 Extraction and RT-PCR methods followed the EUA protocol for the CRSP SARS-CoV-2 Real-  
63 time Reverse Transcriptase (RT)-PCR Diagnostic Assay (V2)

64 (<https://www.fda.gov/media/139858/download>); the target is the N2 gene with a cycle threshold  
65 cut off value of 40. A standard curve was prepared with FDA reference panel material [heat  
66 inactivated virus from BEI Resources ([www.beiresources.org](http://www.beiresources.org))] using serial dilutions (in  
67 triplicate) made in negative clinical matrix then spiked onto dry swabs, allowed to dry, and  
68 subsequently taken all the way through the process.

69

70 **Supplementary Table 1**

71 **Access Bio CareStart results, RT-PCR Ct values, and symptoms in RT-PCR-positive adults**

72

73

| Ct (NZ) | Ct (RP) | CareStart Result | COVID-19 Symptoms? | Symptom Onset Date | Sore Throat | Cough | Chills | Body Aches | Shortness of Breath | Fever | Runny Nose | Congestion | Nausea | Vomiting | Diarrhea | Loss of Taste or Smell | # Days Since Symptom Onset |
|---------|---------|------------------|--------------------|--------------------|-------------|-------|--------|------------|---------------------|-------|------------|------------|--------|----------|----------|------------------------|----------------------------|
| 24.95   | 24.57   | NEG              | Asx                |                    |             |       |        |            |                     |       |            |            |        |          |          |                        | n/a                        |
| 33.36   | 22.85   | NEG              | Asx                |                    |             |       |        |            |                     |       |            |            |        |          |          |                        | n/a                        |
| 31.76   | 21.01   | NEG              | Asx                |                    |             |       |        |            |                     |       |            |            |        |          |          |                        | n/a                        |
| 27.93   | 22.81   | NEG              | Asx                |                    |             |       |        |            |                     |       |            |            |        |          |          |                        | n/a                        |
| 33.89   | 21.36   | NEG              | Asx                |                    |             |       |        |            |                     |       |            |            |        |          |          |                        | n/a                        |
| 34.61   | 23.25   | NEG              | Asx                |                    |             |       |        |            |                     |       |            |            |        |          |          |                        | n/a                        |
| 28.67   | 25.59   | NEG              | Asx                |                    |             |       |        |            |                     |       |            |            |        |          |          |                        | n/a                        |
| 34.3    | 22.37   | NEG              | Asx                |                    |             |       |        |            |                     |       |            |            |        |          |          |                        | n/a                        |
| 35.81   | 24.12   | NEG              | Asx                |                    |             |       |        |            |                     |       |            |            |        |          |          |                        | n/a                        |
| 35.76   | 24.69   | NEG              | Asx                |                    |             |       |        |            |                     |       |            |            |        |          |          |                        | n/a                        |
| 37.23   | 23.2    | NEG              | Asx                |                    |             |       |        |            |                     |       |            |            |        |          |          |                        | n/a                        |
| 26.63   | 21.59   | NEG              | Asx                |                    |             |       |        |            |                     |       |            |            |        |          |          |                        | n/a                        |
| 30.92   | 21.51   | NEG              | Asx                |                    |             |       |        |            |                     |       |            |            |        |          |          |                        | n/a                        |
| 30.35   | 22.58   | NEG              | Asx                |                    |             |       |        |            |                     |       |            |            |        |          |          |                        | n/a                        |
| 33.26   | 22.13   | NEG              | Asx                |                    |             |       |        |            |                     |       |            |            |        |          |          |                        | n/a                        |
| 30.65   | 23.78   | NEG              | Asx                |                    |             |       |        |            |                     |       |            |            |        |          |          |                        | n/a                        |
| 36.63   | 22.78   | NEG              | Asx                |                    |             |       |        |            |                     |       |            |            |        |          |          |                        | n/a                        |
| 37.73   | 20.6    | NEG              | Asx                |                    |             |       |        |            |                     |       |            |            |        |          |          |                        | n/a                        |
| 39.05   | 17.81   | NEG              | Asx                |                    |             |       |        |            |                     |       |            |            |        |          |          |                        | n/a                        |
| 36.32   | 25.37   | NEG              | Asx                |                    |             |       |        |            |                     |       |            |            |        |          |          |                        | n/a                        |
| 34.32   | 23.89   | NEG              | Asx                |                    |             |       |        |            |                     |       |            |            |        |          |          |                        | n/a                        |
| 35.64   | 21.85   | NEG              | Asx                |                    |             |       |        |            |                     |       |            |            |        |          |          |                        | n/a                        |
| 29.7    | 24.44   | NEG              | Asx                |                    |             |       |        |            |                     |       |            |            |        |          |          |                        | n/a                        |
| 34.77   | 24.55   | NEG              | Asx                |                    |             |       |        |            |                     |       |            |            |        |          |          |                        | n/a                        |
| 29.92   | 23.35   | NEG              | Asx                |                    |             |       |        |            |                     |       |            |            |        |          |          |                        | n/a                        |
| 30.99   | 26.28   | NEG              | Asx                |                    |             |       |        |            |                     |       |            |            |        |          |          |                        | n/a                        |
| 27.38   | 24.53   | NEG              | Asx                |                    |             |       |        |            |                     |       |            |            |        |          |          |                        | n/a                        |
| 34.59   | 26.75   | NEG              | Asx                |                    |             |       |        |            |                     |       |            |            |        |          |          |                        | n/a                        |
| 27.7    | 22.64   | NEG              | Asx                |                    |             |       |        |            |                     |       |            |            |        |          |          |                        | n/a                        |
| 32.99   | 26.83   | NEG              | Asx                |                    |             |       |        |            |                     |       |            |            |        |          |          |                        | n/a                        |
| 26.67   | 21.52   | NEG              | Asx                |                    |             |       |        |            |                     |       |            |            |        |          |          |                        | n/a                        |
| 28.22   | 22.2    | NEG              | Asx                |                    |             |       |        |            |                     |       |            |            |        |          |          |                        | n/a                        |
| 28.48   | 19.64   | NEG              | Asx                |                    |             |       |        |            |                     |       |            |            |        |          |          |                        | n/a                        |
| 28.51   | 25.35   | NEG              | Asx                |                    |             |       |        |            |                     |       |            |            |        |          |          |                        | n/a                        |
| 30.55   | 22.75   | NEG              | Asx                |                    |             |       |        |            |                     |       |            |            |        |          |          |                        | n/a                        |
| 36.41   | 22.85   | NEG              | Asx                |                    |             |       |        |            |                     |       |            |            |        |          |          |                        | n/a                        |
| 32.47   | 23.63   | NEG              | Asx                |                    |             |       |        |            |                     |       |            |            |        |          |          |                        | n/a                        |
| 34.69   | 23.86   | NEG              | Asx                |                    |             |       |        |            |                     |       |            |            |        |          |          |                        | n/a                        |
| 32.62   | 21.26   | NEG              | Asx                |                    |             |       |        |            |                     |       |            |            |        |          |          |                        | n/a                        |
| 33.59   | 22.97   | NEG              | Asx                |                    |             |       |        |            |                     |       |            |            |        |          |          |                        | n/a                        |
| 34.32   | 23.75   | NEG              | Asx                |                    |             |       |        |            |                     |       |            |            |        |          |          |                        | n/a                        |
| 35.24   | 21.13   | NEG              | Asx                |                    |             |       |        |            |                     |       |            |            |        |          |          |                        | n/a                        |
| 35.55   | 23.88   | NEG              | Asx                |                    |             |       |        |            |                     |       |            |            |        |          |          |                        | n/a                        |
| 30.41   | 23.8    | NEG              | Asx                |                    |             |       |        |            |                     |       |            |            |        |          |          |                        | n/a                        |
| 26.65   | 21.23   | NEG              | Asx                |                    |             |       |        |            |                     |       |            |            |        |          |          |                        | n/a                        |
| 34.47   | 22.41   | NEG              | Asx                |                    |             |       |        |            |                     |       |            |            |        |          |          |                        | n/a                        |
| 34.07   | 22.28   | NEG              | Asx                |                    |             |       |        |            |                     |       |            |            |        |          |          |                        | n/a                        |
| 34.4    | 27.22   | NEG              | Asx                |                    |             |       |        |            |                     |       |            |            |        |          |          |                        | n/a                        |
| 30.29   | 23.7    | NEG              | Asx                |                    |             |       |        |            |                     |       |            |            |        |          |          |                        | n/a                        |
| 27.91   | 23.4    | NEG              | Asx                |                    |             |       |        |            |                     |       |            |            |        |          |          |                        | n/a                        |
| 26.94   | 22.33   | NEG              | Asx                |                    |             |       |        |            |                     |       |            |            |        |          |          |                        | n/a                        |
| 26.93   | 20.95   | NEG              | Asx                |                    |             |       |        |            |                     |       |            |            |        |          |          |                        | n/a                        |
| 27.79   | 25      | NEG              | Asx                |                    |             |       |        |            |                     |       |            |            |        |          |          |                        | n/a                        |
| 29.76   | 20.61   | NEG              | Asx                |                    |             |       |        |            |                     |       |            |            |        |          |          |                        | n/a                        |
| 32.46   | 24.46   | NEG              | Asx                |                    |             |       |        |            |                     |       |            |            |        |          |          |                        | n/a                        |
| 27.35   | 21.59   | NEG              | Asx                |                    |             |       |        |            |                     |       |            |            |        |          |          |                        | n/a                        |
| 29.62   | 24.25   | NEG              | Asx                |                    |             |       |        |            |                     |       |            |            |        |          |          |                        | n/a                        |
| 23.18   | 23.38   | NEG              | Asx                |                    |             |       |        |            |                     |       |            |            |        |          |          |                        | n/a                        |
| 21.91   | 22.68   | NEG              | Asx                |                    |             |       |        |            |                     |       |            |            |        |          |          |                        | n/a                        |
| 34.68   | 23.38   | NEG              | Asx                |                    |             |       |        |            |                     |       |            |            |        |          |          |                        | n/a                        |
| 28.26   | 24.32   | NEG              | Asx                |                    |             |       |        |            |                     |       |            |            |        |          |          |                        | n/a                        |
| 29.9    | 24.29   | NEG              | Asx                |                    |             |       |        |            |                     |       |            |            |        |          |          |                        | n/a                        |
| 27.91   | 25.82   | NEG              | Asx                |                    |             |       |        |            |                     |       |            |            |        |          |          |                        | n/a                        |
| 31.44   | 23.77   | NEG              | Asx                |                    |             |       |        |            |                     |       |            |            |        |          |          |                        | n/a                        |
| 20.1    | 20.4    | POS              | Asx                |                    |             |       |        |            |                     |       |            |            |        |          |          |                        | n/a                        |
| 20.79   | 22.44   | POS              | Asx                |                    |             |       |        |            |                     |       |            |            |        |          |          |                        | n/a                        |
| 18.51   | 22.46   | POS              | Asx                |                    |             |       |        |            |                     |       |            |            |        |          |          |                        | n/a                        |
| 31.35   | 26.2    | POS              | Asx                |                    |             |       |        |            |                     |       |            |            |        |          |          |                        | n/a                        |
| 19.15   | 23.86   | POS              | Asx                |                    |             |       |        |            |                     |       |            |            |        |          |          |                        | n/a                        |
| 17.34   | 24.02   | POS              | Asx                |                    |             |       |        |            |                     |       |            |            |        |          |          |                        | n/a                        |
| 17.08   | 23.56   | POS              | Asx                |                    |             |       |        |            |                     |       |            |            |        |          |          |                        | n/a                        |
| 13.96   | 22.88   | POS              | Asx                |                    |             |       |        |            |                     |       |            |            |        |          |          |                        | n/a                        |
| 20.45   | 21.9    | POS              | Asx                |                    |             |       |        |            |                     |       |            |            |        |          |          |                        | n/a                        |
| 15.13   | 25.65   | POS              | Asx                |                    |             |       |        |            |                     |       |            |            |        |          |          |                        | n/a                        |
| 30.15   | 22.31   | POS              | Asx                |                    |             |       |        |            |                     |       |            |            |        |          |          |                        | n/a                        |
| 17.4    | 23.92   | POS              | Asx                |                    |             |       |        |            |                     |       |            |            |        |          |          |                        | n/a                        |
| 26.2    | 27.71   | POS              | Asx                |                    |             |       |        |            |                     |       |            |            |        |          |          |                        | n/a                        |
| 20.09   | 24.63   | POS              | Asx                |                    |             |       |        |            |                     |       |            |            |        |          |          |                        | n/a                        |
| 17.47   | 24.13   | POS              | Asx                |                    |             |       |        |            |                     |       |            |            |        |          |          |                        | n/a                        |
| 24.81   | 23.71   | POS              | Asx                |                    |             |       |        |            |                     |       |            |            |        |          |          |                        | n/a                        |
| 17.92   | 23.84   | POS              | Asx                |                    |             |       |        |            |                     |       |            |            |        |          |          |                        | n/a                        |
| 22.76   | 23.29   | POS              | Asx                |                    |             |       |        |            |                     |       |            |            |        |          |          |                        | n/a                        |
| 25.47   | 28      | POS              | Asx                |                    |             |       |        |            |                     |       |            |            |        |          |          |                        | n/a                        |
| 17.89   | 21.26   | POS              | Asx                |                    |             |       |        |            |                     |       |            |            |        |          |          |                        | n/a                        |
| 29.49   | 23.34   | POS              | Asx                |                    |             |       |        |            |                     |       |            |            |        |          |          |                        | n/a                        |
| 15.54   | 19.51   | POS              | Asx                |                    |             |       |        |            |                     |       |            |            |        |          |          |                        | n/a                        |
| 28.99   | 24.59   | POS              | Asx                |                    |             |       |        |            |                     |       |            |            |        |          |          |                        | n/a                        |
| 28.41   | 24.24   | POS              | Asx                |                    |             |       |        |            |                     |       |            |            |        |          |          |                        | n/a                        |
| 15.67   | 21.97   | POS              | Asx                |                    |             |       |        |            |                     |       |            |            |        |          |          |                        | n/a                        |
| 15.31   | 23.37   | POS              | Asx                |                    |             |       |        |            |                     |       |            |            |        |          |          |                        | n/a                        |
| 23.61   | 19.32   | POS              | Asx                |                    |             |       |        |            |                     |       |            |            |        |          |          |                        | n/a                        |
| 26.5    | 22.63   | POS              | Asx                |                    |             |       |        |            |                     |       |            |            |        |          |          |                        | n/a                        |
| 22.62   | 25.21   | POS              | Asx                |                    |             |       |        |            |                     |       |            |            |        |          |          |                        | n/a                        |

74



81  
82  
83  
84  
85  
86

**Supplementary Table 2**

**Access Bio CareStart results, RT-PCR Ct values, and symptoms in RT-PCR-positive children**

| Ct (N2) | Ct (RP) | CareStart Result | COVID-19 symptoms? | Symptom Onset Date | Sore Throat | Cough | Chills | Body Aches | Shortness of Breath | Fever | Runny Nose | Congestion | Nausea | Vomiting | Diarrhea | Loss of Taste or Smell | # Days Since Symptom Onset |
|---------|---------|------------------|--------------------|--------------------|-------------|-------|--------|------------|---------------------|-------|------------|------------|--------|----------|----------|------------------------|----------------------------|
| 29.96   | 26.16   | NEG              | ASx                |                    |             |       |        |            |                     |       |            |            |        |          |          |                        | n/a                        |
| 30.77   | 26.34   | NEG              | ASx                |                    |             |       |        |            |                     |       |            |            |        |          |          |                        | n/a                        |
| 34.39   | 20.8    | NEG              | ASx                |                    |             |       |        |            |                     |       |            |            |        |          |          |                        | n/a                        |
| 32.05   | 22.43   | NEG              | ASx                |                    |             |       |        |            |                     |       |            |            |        |          |          |                        | n/a                        |
| 28.09   | 23.37   | NEG              | ASx                |                    |             |       |        |            |                     |       |            |            |        |          |          |                        | n/a                        |
| 34.43   | 22.09   | NEG              | ASx                |                    |             |       |        |            |                     |       |            |            |        |          |          |                        | n/a                        |
| 28.75   | 21.62   | NEG              | ASx                |                    |             |       |        |            |                     |       |            |            |        |          |          |                        | n/a                        |
| 31.65   | 22.16   | NEG              | ASx                |                    |             |       |        |            |                     |       |            |            |        |          |          |                        | n/a                        |
| 32.25   | 21.06   | NEG              | ASx                |                    |             |       |        |            |                     |       |            |            |        |          |          |                        | n/a                        |
| 36.73   | 20.38   | NEG              | ASx                |                    |             |       |        |            |                     |       |            |            |        |          |          |                        | n/a                        |
| 34.95   | 23.23   | NEG              | ASx                |                    |             |       |        |            |                     |       |            |            |        |          |          |                        | n/a                        |
| 35.48   | 23.37   | NEG              | ASx                |                    |             |       |        |            |                     |       |            |            |        |          |          |                        | n/a                        |
| 28.81   | 24.7    | NEG              | ASx                |                    |             |       |        |            |                     |       |            |            |        |          |          |                        | n/a                        |
| 27.74   | 21.65   | NEG              | ASx                |                    |             |       |        |            |                     |       |            |            |        |          |          |                        | n/a                        |
| 32.9    | 22.36   | NEG              | ASx                |                    |             |       |        |            |                     |       |            |            |        |          |          |                        | n/a                        |
| 32      | 27.23   | NEG              | ASx                |                    |             |       |        |            |                     |       |            |            |        |          |          |                        | n/a                        |
| 34.29   | 22.37   | NEG              | ASx                |                    |             |       |        |            |                     |       |            |            |        |          |          |                        | n/a                        |
| 34.64   | 22.36   | NEG              | ASx                |                    |             |       |        |            |                     |       |            |            |        |          |          |                        | n/a                        |
| 27.85   | 23.64   | POS              | ASx                |                    |             |       |        |            |                     |       |            |            |        |          |          |                        | n/a                        |
| 22.61   | 26.97   | POS              | ASx                |                    |             |       |        |            |                     |       |            |            |        |          |          |                        | n/a                        |
| 26.08   | 21.33   | POS              | ASx                |                    |             |       |        |            |                     |       |            |            |        |          |          |                        | n/a                        |
| 19.9    | 21.12   | POS              | ASx                |                    |             |       |        |            |                     |       |            |            |        |          |          |                        | n/a                        |
| 31.81   | 23.45   | POS              | ASx                |                    |             |       |        |            |                     |       |            |            |        |          |          |                        | n/a                        |
| 26.3    | 22      | POS              | ASx                |                    |             |       |        |            |                     |       |            |            |        |          |          |                        | n/a                        |
| 24.16   | 24.74   | POS              | ASx                |                    |             |       |        |            |                     |       |            |            |        |          |          |                        | n/a                        |
| 31.74   | 20.19   | POS              | ASx                |                    |             |       |        |            |                     |       |            |            |        |          |          |                        | n/a                        |
| 18.51   | 24.67   | POS              | ASx                |                    |             |       |        |            |                     |       |            |            |        |          |          |                        | n/a                        |
| 16.01   | 23.3    | POS              | ASx                |                    |             |       |        |            |                     |       |            |            |        |          |          |                        | n/a                        |
| 22.77   | 22.61   | POS              | ASx                |                    |             |       |        |            |                     |       |            |            |        |          |          |                        | n/a                        |
| 15.44   | 20.14   | POS              | ASx                |                    |             |       |        |            |                     |       |            |            |        |          |          |                        | n/a                        |
| 13.7    | 23.09   | POS              | ASx                |                    |             |       |        |            |                     |       |            |            |        |          |          |                        | n/a                        |
| 15.12   | 23.28   | POS              | ASx                |                    |             |       |        |            |                     |       |            |            |        |          |          |                        | n/a                        |
| 18.04   | 23.59   | POS              | ASx                |                    |             |       |        |            |                     |       |            |            |        |          |          |                        | n/a                        |
| 18.59   | 22.03   | POS              | ASx                |                    |             |       |        |            |                     |       |            |            |        |          |          |                        | n/a                        |
| 23.88   | 27.23   | POS              | ASx                |                    |             |       |        |            |                     |       |            |            |        |          |          |                        | n/a                        |
| 19.95   | 23.95   | POS              | ASx                |                    |             |       |        |            |                     |       |            |            |        |          |          |                        | n/a                        |
| 16.81   | 25.38   | POS              | ASx                |                    |             |       |        |            |                     |       |            |            |        |          |          |                        | n/a                        |
| 30.83   | 24.85   | NEG              | Sx                 | 1/12/21            | Y           | Y     |        |            | Y                   |       | Y          |            |        |          |          |                        | 1                          |
| 22.57   | 25.33   | POS              | Sx                 | 1/9/21             | Y           |       |        |            |                     |       | Y          |            |        |          |          |                        | 2                          |
| 26.59   | 27.14   | POS              | Sx                 | 1/19/21            |             | Y     |        | Y          |                     |       |            | Y          | Y      | Y        |          |                        | 3                          |
| 22.68   | 21.28   | POS              | Sx                 | 1/12/21            |             |       |        |            |                     |       |            |            |        | Y        |          |                        | 2                          |
| 19.25   | 24.04   | POS              | Sx                 | 1/16/21            |             | Y     |        | Y          |                     | Y     |            |            |        |          |          | Y                      | 3                          |
| 14.76   | 24.93   | POS              | Sx                 | 1/17/21            | Y           | Y     |        | Y          |                     | Y     |            |            |        |          |          |                        | 2                          |
| 21.88   | 24.97   | POS              | Sx                 | 1/16/21            |             |       |        | Y          |                     |       |            | Y          |        |          |          | Y                      | 3                          |
| 34.52   | 23.61   | NEG              | Sx7+               | 1/3/21             |             | Y     |        |            |                     | Y     | Y          | Y          | Y      |          |          |                        | 10                         |
| 20.28   | 25.88   | POS              | Sx7+               | 1/1/21             | Y           | Y     |        |            | Y                   | Y     | Y          | Y          |        |          |          |                        | 10                         |

87  
88  
89  
90  
91  
92  
93  
94  
95  
96

RT-PCR, real-time reverse transcription polymerase chain reaction; F, female; M, male; POS, positive; NEG, negative; Ct, cycle threshold; N2, SARS-CoV-2 target; RP, host control target; ASx, asymptomatic; Sx, symptomatic; n/a, not applicable

97 **Supplementary Table 3**

98

99 **Distribution of positive and negative CareStart and RT-PCR results across clinical**  
 100 **subgroups**

101

| <b>Asymptomatic (Children: ≤18 y)</b> |                 |                 |              |
|---------------------------------------|-----------------|-----------------|--------------|
| <b>CareStart Ag</b>                   | <b>RT-PCR</b>   |                 |              |
|                                       | <b>Positive</b> | <b>Negative</b> | <b>Total</b> |
| <b>Positive</b>                       | 19              | 4               | 23           |
| <b>Negative</b>                       | 18              | 180             | 198          |
| <b>Total (16.7% prevalence)</b>       | 37              | 184             | 221          |

| <b>Asymptomatic (Adults: &gt;18 y)</b> |                 |                 |              |
|----------------------------------------|-----------------|-----------------|--------------|
| <b>CareStart Ag</b>                    | <b>RT-PCR</b>   |                 |              |
|                                        | <b>Positive</b> | <b>Negative</b> | <b>Total</b> |
| <b>Positive</b>                        | 64              | 8               | 72           |
| <b>Negative</b>                        | 64              | 900             | 964          |
| <b>Total (12.4% prevalence)</b>        | 128             | 908             | 1036         |

| <b>Symptomatic ≤5 days (Children: ≤18 y)</b> |                 |                 |              |
|----------------------------------------------|-----------------|-----------------|--------------|
| <b>CareStart Ag</b>                          | <b>RT-PCR</b>   |                 |              |
|                                              | <b>Positive</b> | <b>Negative</b> | <b>Total</b> |
| <b>Positive</b>                              | 6               | 2               | 8            |
| <b>Negative</b>                              | 1               | 17              | 18           |
| <b>Total (26.9% prevalence)</b>              | 7               | 19              | 26           |

| <b>Symptomatic ≤5 days (Adults: &gt;18 y)</b> |                 |                 |              |
|-----------------------------------------------|-----------------|-----------------|--------------|
| <b>CareStart Ag</b>                           | <b>RT-PCR</b>   |                 |              |
|                                               | <b>Positive</b> | <b>Negative</b> | <b>Total</b> |
| <b>Positive</b>                               | 39              | 3               | 42           |
| <b>Negative</b>                               | 7               | 103             | 110          |
| <b>Total (30.3% prevalence)</b>               | 46              | 106             | 152          |

| <b>Symptomatic ≤7 days (Children: ≤18 y)</b> |                 |                 |              |
|----------------------------------------------|-----------------|-----------------|--------------|
| <b>CareStart Ag</b>                          | <b>RT-PCR</b>   |                 |              |
|                                              | <b>Positive</b> | <b>Negative</b> | <b>Total</b> |
| <b>Positive</b>                              | 6               | 3               | 9            |
| <b>Negative</b>                              | 1               | 17              | 18           |
| <b>Total (25.9% prevalence)</b>              | 7               | 20              | 27           |

| <b>Symptomatic ≤7 days (Adults: &gt;18 y)</b> |                 |                 |              |
|-----------------------------------------------|-----------------|-----------------|--------------|
| <b>CareStart Ag</b>                           | <b>RT-PCR</b>   |                 |              |
|                                               | <b>Positive</b> | <b>Negative</b> | <b>Total</b> |
| <b>Positive</b>                               | 43              | 3               | 46           |
| <b>Negative</b>                               | 8               | 115             | 123          |
| <b>Total (30.2% prevalence)</b>               | 51              | 118             | 169          |

| <b>Symptomatic &gt;7 days (Children ≤18 y)</b> |                 |                 |              |
|------------------------------------------------|-----------------|-----------------|--------------|
| <b>CareStart Ag</b>                            | <b>RT-PCR</b>   |                 |              |
|                                                | <b>Positive</b> | <b>Negative</b> | <b>Total</b> |
| <b>Positive</b>                                | 1               | 0               | 1            |
| <b>Negative</b>                                | 1               | 3               | 4            |
| <b>Total (40.0% prevalence)</b>                | 2               | 3               | 5            |

| <b>Symptomatic &gt;7 days (Adults &gt;18 y)</b> |                 |                 |              |
|-------------------------------------------------|-----------------|-----------------|--------------|
| <b>CareStart Ag</b>                             | <b>RT-PCR</b>   |                 |              |
|                                                 | <b>Positive</b> | <b>Negative</b> | <b>Total</b> |
| <b>Positive</b>                                 | 2               | 3               | 5            |
| <b>Negative</b>                                 | 7               | 28              | 35           |
| <b>Total (22.5% prevalence)</b>                 | 9               | 31              | 40           |

102

103 RT-PCR, real-time reverse transcription polymerase chain reaction; Y, years; Ag, Antigen

104

105

106  
107  
108  
109  
110

**Supplementary Table 4**

**Performance of the Access Bio CareStart versus RT-PCR with varied Ct value cutoffs**

|                                       | All Ct Values |             |             |             | Ct values ≤35 |             |             |             | Ct values ≤30 |             |             |             | Ct values ≤25 |             |             |             |
|---------------------------------------|---------------|-------------|-------------|-------------|---------------|-------------|-------------|-------------|---------------|-------------|-------------|-------------|---------------|-------------|-------------|-------------|
|                                       | N             | TP<br>(+/+) | FN<br>(+/-) | Sensitivity | N             | TP<br>(+/+) | FN<br>(+/-) | Sensitivity | N             | TP<br>(+/+) | FN<br>(+/-) | Sensitivity | N             | TP<br>(+/+) | FN<br>(+/-) | Sensitivity |
| <b>Combined All</b>                   | 234           | 135         | 99          | 57.7%       | 220           | 135         | 85          | 61.4%       | 162           | 129         | 33          | 79.6%       | 107           | 103         | 4           | 96.3%       |
| <b>All Children<br/>(All Sx, ASx)</b> | 46            | 26          | 20          | 56.5%       | 44            | 26          | 18          | 59.1%       | 29            | 24          | 5           | 82.8%       | 12            | 12          | 0           | 100.0%      |
| <b>All Adult<br/>(All Sx, ASx)</b>    | 188           | 109         | 79          | 58.0%       | 176           | 109         | 67          | 61.9%       | 133           | 105         | 28          | 78.9%       | 95            | 91          | 4           | 95.8%       |
| <b>Sx (≤5D)<br/>Children</b>          | 7             | 6           | 1           | 85.7%       | 7             | 6           | 1           | 85.7%       | 6             | 6           | 0           | 100.0%      | 5             | 5           | 0           | 100.0%      |
| <b>Sx (≤5D)<br/>Adult</b>             | 46            | 39          | 7           | 84.8%       | 46            | 39          | 7           | 84.8%       | 41            | 39          | 2           | 92.9%       | 37            | 36          | 1           | 97.3%       |
| <b>Sx (≤7D)<br/>Children</b>          | 7             | 6           | 1           | 85.7%       | 7             | 6           | 1           | 85.7%       | 6             | 6           | 0           | 100.0%      | 5             | 5           | 0           | 100.0%      |
| <b>Sx (≤7D)<br/>Adult</b>             | 51            | 43          | 8           | 84.3%       | 51            | 43          | 8           | 84.3%       | 45            | 43          | 2           | 95.6%       | 40            | 39          | 1           | 97.5%       |
| <b>ASx<br/>Children</b>               | 37            | 19          | 18          | 51.4%       | 34            | 19          | 15          | 55.9%       | 22            | 17          | 5           | 77.3%       | 14            | 14          | 0           | 100.0%      |
| <b>ASx Adult</b>                      | 128           | 64          | 64          | 50.0%       | 117           | 64          | 53          | 54.7%       | 85            | 60          | 25          | 70.6%       | 53            | 50          | 3           | 94.3%       |

111  
112  
113  
114  
115  
116

RT-PCR, real-time reverse transcription polymerase chain reaction; Ct, cycle threshold; TP, true positive (RT-PCR positive/CareStart positive); FN, false negative (RT-PCR positive/CareStart negative); Sens, sensitivity; Sx, symptomatic; ASx, asymptomatic; D, days
